# Supplementary material
Source: bioRxiv or medRxiv preprint supplement (https://www.biorxiv.org/highwire/filestream/135240/field_highwire_adjunct_files/1/450197-2.pdf)
Supplement: Supplementary file [file 450197-2.pdf]

Statistically significant difference at 75th percentile not at median

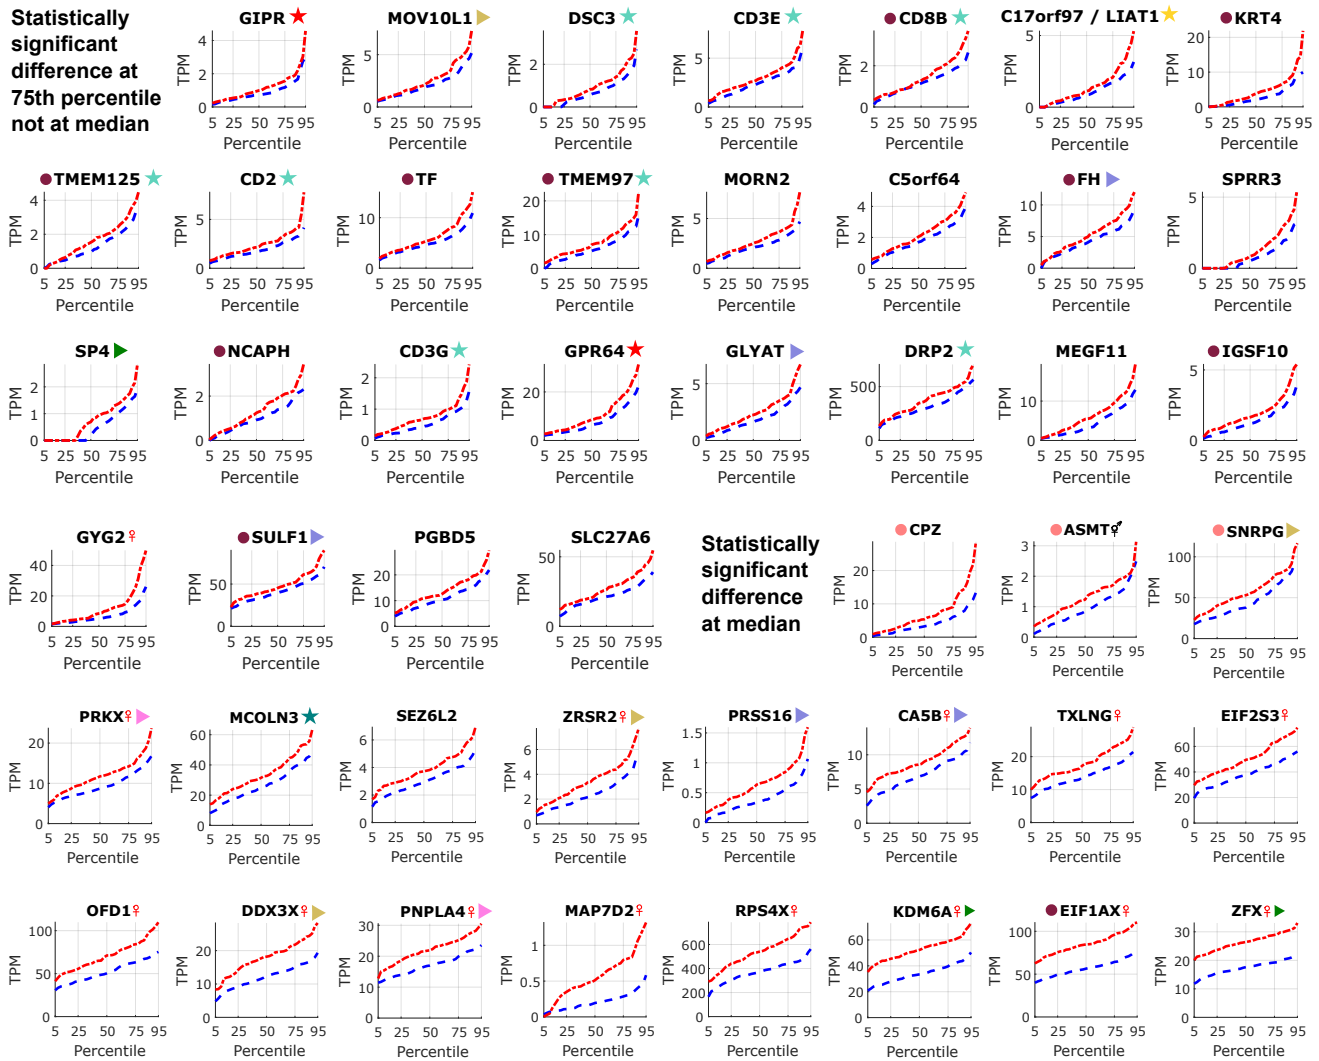

**Association with pain**

- Associated with pain in Comparative Toxicogenomics Database (CTD)
- Protein interaction with gene associated with pain in CTD

**Regulatory potential**

- ▶ Transcription factor or chromatin remodeller
- ▶ RNA binding, RNA transport, alt splicing, or post transcriptional regulator

▶ Post translational transporter or protein activity modulator

▶ Enzyme

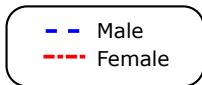

**Signal transduction**

- ★ Ion channels
- ★ GPCR
- ★ Other membrane protein
- ★ Other signalling proteins

**Sex linkage**

- ♂ Y-linked
- ♀ X-linked
- ♀ PAR-linked

Supplementary Image S2. Quantile plots for all genes upregulated in female BSL sub-cohort
